# Supplementary material for: Prognostic Cardiac Magnetic Resonance Markers of Left Ventricular Involvement in Arrhythmogenic Cardiomyopathy for Predicting Heart Failure Outcomes
Source: PubMed Central journal article supplement — J Am Heart Assoc. 2022 Mar 9;11(6):e023167. doi: 10.1161/JAHA.121.023167 (PMC9075293; doi:10.1161/jaha.121.023167), 2022-03-09
Supplement: JAH3-11-e023167-s001.pdf [file JAH3-11-e023167-s001.pdf]

# **SUPPLEMENTAL MATERIAL**

**Table S1. Gene analysis, ACMG classification and mapping values of genetic ACM patients.**

| <b>Age/sex</b> | <b>Variant</b>          | <b>Padua criteria</b> | <b>LGE<br/>RV/LV</b> | <b>Native T1<br/>(ms)</b> | <b>T2<br/>(ms)</b> | <b>ECV<br/>(%)</b> |
|----------------|-------------------------|-----------------------|----------------------|---------------------------|--------------------|--------------------|
| 29/ Male       | PKP2 (P)                | RV                    | -/-                  | 1216.9                    | 24.5               | 50.6               |
| 30/ Male       | PKP2 (LP),<br>BAG3 (LP) | RV                    | +/-                  | 1342                      | 30.3               | 49.7               |
| 72/ Male       | DSP (P)                 | Biventricular         | +/+                  | 1435.6                    | 42.1               | 57.9               |
| 52/ Male       | TMEM43 (LP)             | Biventricular         | +/+                  | 1357                      | 38.9               | 52.8               |

ACM, arrhythmogenic cardiomyopathy; ACMG, American College of Medical Genetics and Genomics guideline; BAG3, Bcl2-associated athanogene 3; DSP, desmoplakin; ECV, extracellular volume fraction; LGE, late gadolinium enhancement; LP, likely pathogenic; LV, left ventricle; P, pathogenic; PKP2, plakophilin-2; RV, right ventricle; TMEM43, transmembrane Protein 43.

**Figure S1. Survival Curves for heart failure-related events categorized by LGE, native T1, T2, and ECV in addition to CMR LVEF.**

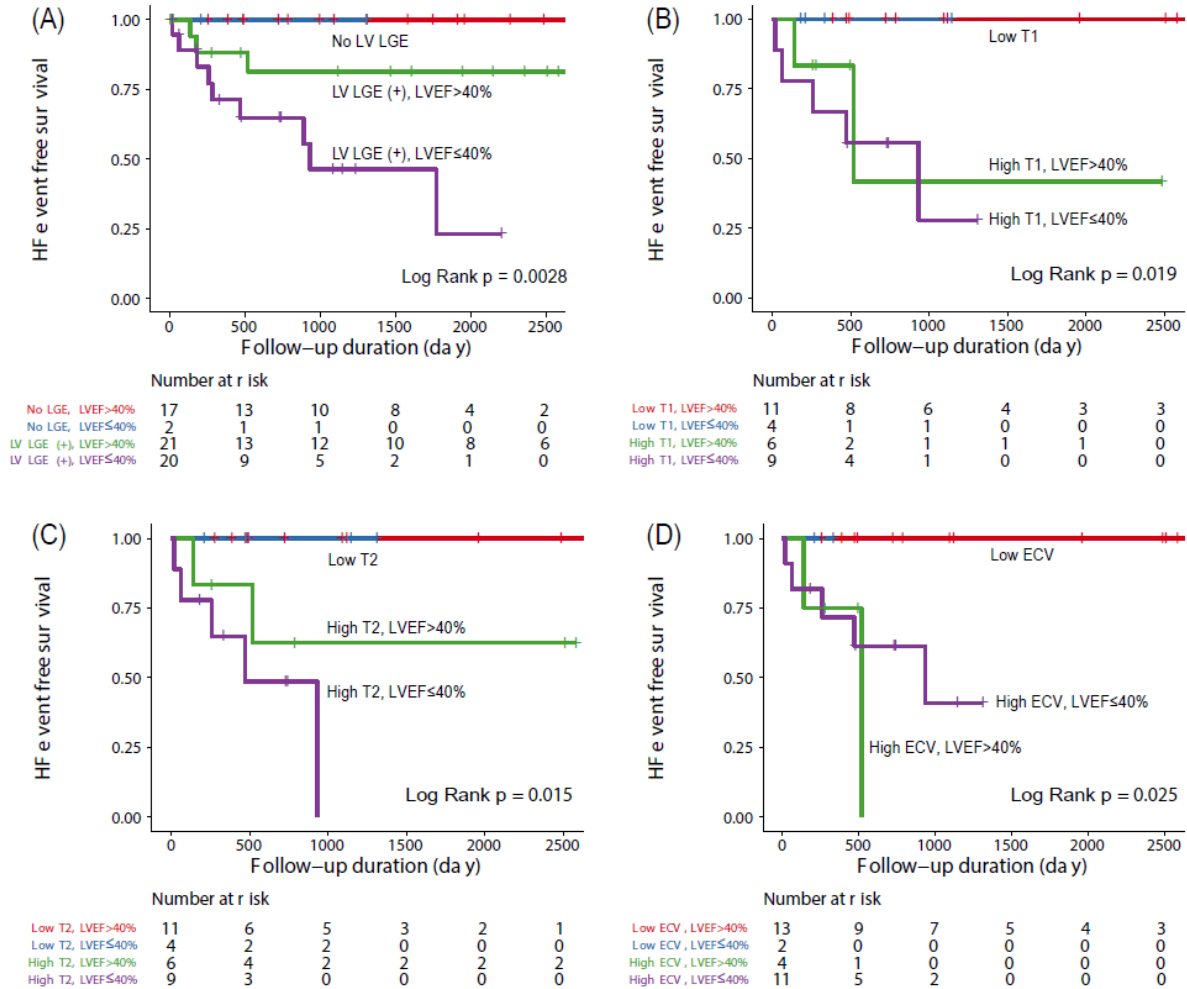

Kaplan-Meier survival curves for heart failure-related events according to LV late gadolinium enhancement (LGE) (A), native T1 (B), T2 (C), and ECV (D) in addition to CMR LVEF (>40 or ≤40%).

ECV, extracellular volume; CMR, cardiac magnetic resonance; LV, left ventricle; EF, ejection fraction.

**Figure S2. Survival Curves for VT Categorized by LGE, native T1, and T2.**

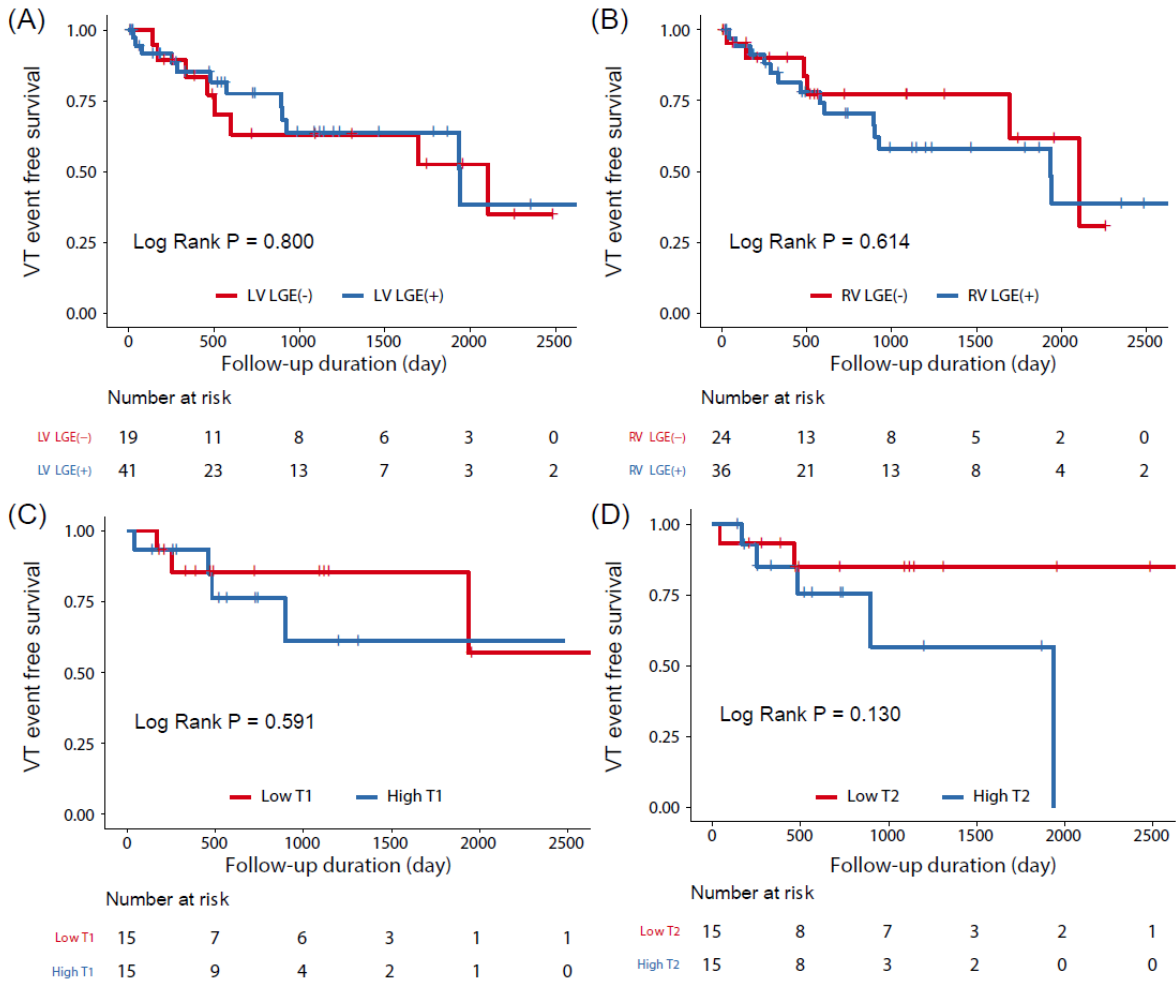

Kaplan-Meier survival curves for ventricular arrhythmic events according to LV late gadolinium enhancement (LGE) (A), RV LGE (B), native T1 (C), and T2 (D).

LV, left ventricle; RV, right ventricle; VT, ventricular tachycardia.
